# Supplementary material
Source: HighWire-hosted journal article supplement (https://cancerdiscovery.aacrjournals.org/content/suppl/2020/10/30/2159-8290.CD-20-0672)
Supplement: 243330_2_supp_6676976_q1tb8l.pdf [file 243330_2_supp_6676976_q1tb8l.pdf]

**Supplementary Data Table S2. Sample counts by tumor type.**

| Tumor Type                              | Sample Number | PD-L1 Stained Sample Number | HLA-I LOH Prevalence (%) |
|-----------------------------------------|---------------|-----------------------------|--------------------------|
| thymic                                  | 136           | 24                          | 41.9                     |
| cervical squamous cell carcinoma        | 336           | 54                          | 39.0                     |
| pancreatic islet cell                   | 254           | 38                          | 38.2                     |
| adrenocortical carcinoma                | 172           | 28                          | 36.0                     |
| anal squamous cell carcinoma            | 236           | 39                          | 36.0                     |
| penile squamous cell carcinoma          | 63            | 13                          | 31.7                     |
| lung squamous cell carcinoma            | 2666          | 842                         | 31.3                     |
| unknown primary squamous cell carcinoma | 560           | 92                          | 28.4                     |
| head and neck squamous cell carcinoma   | 1134          | 180                         | 27.2                     |
| skin squamous cell carcinoma            | 256           | 46                          | 25.4                     |
| esophageal                              | 1967          | 340                         | 24.5                     |
| vaginal squamous cell carcinoma         | 139           | 25                          | 24.5                     |
| rectal squamous cell carcinoma          | 54            | 6                           | 24.1                     |
| pancreatic                              | 4049          | 527                         | 23.4                     |
| renal                                   | 1371          | 228                         | 23.0                     |
| esophageal squamous cell carcinoma      | 324           | 74                          | 21.3                     |
| cervical                                | 262           | 45                          | 21.0                     |
| non-small cell lung carcinoma (NSCLC)   | 13240         | 3102                        | 20.9                     |
| small intestine                         | 459           | 62                          | 20.9                     |
| fallopian tube                          | 377           | 50                          | 18.8                     |
| biliary                                 | 749           | 120                         | 18.7                     |
| urinary                                 | 199           | 40                          | 18.6                     |
| bone sarcoma                            | 108           | 16                          | 18.5                     |
| gastric                                 | 1207          | 98                          | 18.4                     |
| head and neck neuroendocrine            | 80            | 12                          | 17.5                     |
| germ cell                               | 186           | 26                          | 16.7                     |
| peritoneal                              | 292           | 43                          | 16.4                     |
| unknown primary                         | 5733          | 905                         | 16.3                     |
| cholangiocarcinoma                      | 1542          | 240                         | 16.0                     |
| bladder                                 | 1299          | 178                         | 15.7                     |
| ovarian                                 | 4996          | 661                         | 15.7                     |
| thyroid                                 | 670           | 82                          | 15.7                     |
| colorectal                              | 10682         | 1410                        | 15.3                     |
| appendiceal                             | 316           | 51                          | 13.6                     |
| breast                                  | 9686          | 1139                        | 13.2                     |
| unknown primary neuroendocrine          | 644           | 92                          | 12.9                     |
| soft tissue sarcoma                     | 638           | 66                          | 12.4                     |
| mesothelioma                            | 404           | 70                          | 12.4                     |
| gastrointestinal neuroendocrine         | 269           | 53                          | 12.3                     |
| skin (other)                            | 174           | 34                          | 12.1                     |
| salivary gland                          | 483           | 65                          | 11.4                     |
| non-glioma                              | 716           | 40                          | 10.6                     |
| head and neck                           | 231           | 37                          | 10.4                     |
| carcinoid                               | 249           | 45                          | 9.2                      |
| endometrial                             | 2325          | 347                         | 9.1                      |
| glioma (non-GBM)                        | 1519          | 86                          | 8.8                      |
| gastrointestinal stromal tumor          | 442           | 63                          | 8.1                      |
| glioblastoma (GBM)                      | 2865          | 219                         | 8.1                      |
| adenoid cystic carcinoma                | 474           | 61                          | 6.5                      |
| cutaneous melanoma                      | 1020          | 174                         | 6.1                      |
| small cell                              | 1021          | 181                         | 5.9                      |
| hepatocellular                          | 570           | 88                          | 5.8                      |
| prostate                                | 2774          | 482                         | 5.8                      |
| uterine                                 | 416           | 60                          | 5.5                      |
| non-cutaneous melanoma                  | 222           | 37                          | 5.0                      |
| Wilms tumor                             | 54            | 7                           | 3.7                      |
| prostate neuroendocrine                 | 110           | 24                          | 3.6                      |
| Merkel cell carcinoma                   | 162           | 13                          | 3.1                      |
| adrenal gland neuroendocrine            | 82            | 11                          | 2.4                      |
